# Supplementary material
Source: publisher figshare collection journal article supplement (https://tandf.figshare.com/articles/dataset/_/2066859)
Supplement: Supplementary file 1 [file 1]

## Supplementary

| Compound                | Absorption maximum (nm)             |                  |             |             |             |
|-------------------------|-------------------------------------|------------------|-------------|-------------|-------------|
| <b>TAPP</b>             | Soret band $\pm$ SD                 | Q-bands $\pm$ SD |             |             |             |
| Plain                   | 412 $\pm$ 0                         | 515 $\pm$ 0      | 550 $\pm$ 0 | 579         | 633 $\pm$ 1 |
| 20 $\mu$ M F68 (<cmc)   | 413 $\pm$ 0                         | 515 $\pm$ 0      | 550 $\pm$ 0 | 579 $\pm$ 1 | 634 $\pm$ 1 |
| 240 $\mu$ M F68 (>cmc)  | 414 $\pm$ 0                         | 513 $\pm$ 0      | 547 $\pm$ 0 | 584 $\pm$ 0 | 640 $\pm$ 0 |
| 32 $\mu$ M F127 (<cmc)  | 413 $\pm$ 0                         | 514 $\pm$ 0      | 550 $\pm$ 0 | 580 $\pm$ 1 | 635 $\pm$ 0 |
| 476 $\mu$ M F127 (>cmc) | 415 $\pm$ 0                         | 513 $\pm$ 0      | 547 $\pm$ 0 | 584 $\pm$ 0 | 641 $\pm$ 1 |
| 91 $\mu$ M P123 (<cmc)  | 413 $\pm$ 0                         | 514 $\pm$ 0      | 550 $\pm$ 0 | 581 $\pm$ 0 | 635 $\pm$ 0 |
| 913 $\mu$ M P123 (>cmc) | 413 $\pm$ 0                         | 514 $\pm$ 0      | 548 $\pm$ 0 | 583 $\pm$ 0 | 640 $\pm$ 0 |
| 0.18 mM L44 (<cmc)      | 412 $\pm$ 0                         | 515 $\pm$ 0      | 550 $\pm$ 0 | 579 $\pm$ 0 | 635 $\pm$ 0 |
| 1.8 mM L44 (>cmc)       | 414 $\pm$ 0                         | 513 $\pm$ 0      | 548 $\pm$ 1 | 584 $\pm$ 0 | 640 $\pm$ 0 |
| <b>THPP</b>             | Soret band $\pm$ SD                 | Q-bands $\pm$ SD |             |             |             |
| Plain                   | 419 $\pm$ 2                         | 530 $\pm$ 1      |             | 575 $\pm$ 0 | 660 $\pm$ 1 |
| 20 $\mu$ M F68 (<cmc)   | 422 $\pm$ 0                         | 523 $\pm$ 0      | 562 $\pm$ 1 | 593 $\pm$ 0 | 657 $\pm$ 0 |
| 240 $\mu$ M F68 (>cmc)  | 423 $\pm$ 0                         | 522 $\pm$ 0      | 560 $\pm$ 0 | 596 $\pm$ 0 | 655 $\pm$ 0 |
| 3.2 $\mu$ M F127 (<cmc) | 423 $\pm$ 0                         | 522 $\pm$ 1      | 560 $\pm$ 1 | 595 $\pm$ 0 | 655 $\pm$ 1 |
| 47 $\mu$ M F127 (>cmc)  | 423 $\pm$ 0                         | 520 $\pm$ 0      | 558 $\pm$ 0 | 597 $\pm$ 0 | 655 $\pm$ 0 |
| 1.4 $\mu$ M P123 (<cmc) | 427 $\pm$ 1                         | 521 $\pm$ 1      | 559 $\pm$ 1 | 597 $\pm$ 0 | 655 $\pm$ 0 |
| 35 $\mu$ M P123 (>cmc)  | 424 $\pm$ 0                         | 519 $\pm$ 0      | 558 $\pm$ 0 | 596 $\pm$ 0 | 654 $\pm$ 0 |
| 0.18 mM L44 (<cmc)      | 424 $\pm$ 0                         | 523 $\pm$ 1      | 561 $\pm$ 0 | 596 $\pm$ 0 | 655 $\pm$ 0 |
| 1.8 mM L44 (>cmc)       | 424 $\pm$ 0                         | 520 $\pm$ 0      | 558 $\pm$ 0 | 596 $\pm$ 0 | 654 $\pm$ 1 |
| <b>TSPP</b>             | Soret band $\pm$ SD                 | Q-bands $\pm$ SD |             |             |             |
| Plain                   | 414 $\pm$ 0/434 $\pm$ 0             | 517 $\pm$ 1      | 554 $\pm$ 0 | 596 $\pm$ 0 | 645 $\pm$ 0 |
| 20 $\mu$ M F68 (<cmc)   | 418 $\pm$ 0/434 $\pm$ 0             | 514 $\pm$ 0      | 549 $\pm$ 0 | 592 $\pm$ 0 | 644 $\pm$ 0 |
| 240 $\mu$ M F68 (>cmc)  | 418 $\pm$ 0                         | 514 $\pm$ 0      | 549 $\pm$ 0 | 589 $\pm$ 0 | 644 $\pm$ 0 |
| 3.2 $\mu$ M F127 (<cmc) | 418 $\pm$ 0/434 $\pm$ 0             | 514 $\pm$ 0      | 549 $\pm$ 1 | 591 $\pm$ 0 | 645 $\pm$ 0 |
| 47 $\mu$ M F127 (>cmc)  | 419 $\pm$ 0                         | 514 $\pm$ 0      | 549 $\pm$ 0 | 589 $\pm$ 0 | 644 $\pm$ 0 |
| 1.4 mM P123 (<cmc)      | 416 $\pm$ 0/434 $\pm$ 0             | 515 $\pm$ 0      | 551 $\pm$ 0 | 593 $\pm$ 0 | 645 $\pm$ 0 |
| 14 $\mu$ M P123 (>cmc)  | 419 $\pm$ 0                         | 514 $\pm$ 0      | 549 $\pm$ 0 | 589 $\pm$ 1 | 645 $\pm$ 0 |
| 0.035 mM L44 (<cmc)     | 418 $\pm$ 0/434 $\pm$ 0             | 514 $\pm$ 0      | 549 $\pm$ 0 | 590 $\pm$ 1 | 644 $\pm$ 0 |
| 1.8 mM L44 (>cmc)       | 418 $\pm$ 0                         | 514 $\pm$ 0      | 549 $\pm$ 0 | 588 $\pm$ 0 | 644 $\pm$ 0 |
| <b>TCCP</b>             | Soret band $\pm$ SD                 | Q-bands $\pm$ SD |             |             |             |
| Plain                   | 416 $\pm$ 0/437 $\pm$ 0             | 522 $\pm$ 0      | 556 $\pm$ 1 | 594 $\pm$ 1 | 649 $\pm$ 1 |
| 20 $\mu$ M F68 (<cmc)   | 420 $\pm$ 0/439 $\pm$ 4             | 519 $\pm$ 1      | 554 $\pm$ 1 | 592 $\pm$ 1 | 648 $\pm$ 0 |
| 240 $\mu$ M F68 (>cmc)  | 420 $\pm$ 0                         | 518 $\pm$ 0      | 552 $\pm$ 0 | 592 $\pm$ 0 | 647 $\pm$ 0 |
| 4 $\mu$ M F127 (<cmc)   | 406 $\pm$ 0/421 $\pm$ 0/437 $\pm$ 0 | 520 $\pm$ 0      | 553 $\pm$ 0 | 592 $\pm$ 1 | 648 $\pm$ 0 |
| 60 $\mu$ M F127 (>cmc)  | 420 $\pm$ 0/435 $\pm$ 1             | 518 $\pm$ 0      | 552 $\pm$ 0 | 592 $\pm$ 0 | 648 $\pm$ 1 |
| 1.4 $\mu$ M P123 (<cmc) | 406 $\pm$ 0/436 $\pm$ 0/443 $\pm$ 0 | 520 $\pm$ 0      | 553 $\pm$ 0 | 592 $\pm$ 0 | 648 $\pm$ 0 |
| 14 $\mu$ M P123 (>cmc)  | 420 $\pm$ 0/444 $\pm$ 0             | 516 $\pm$ 0      | 551 $\pm$ 1 | 592 $\pm$ 0 | 647 $\pm$ 0 |
| 0.18 mM L44 (<cmc)      | 420 $\pm$ 0/436 $\pm$ 0             | 520 $\pm$ 0      | 554 $\pm$ 0 | 592 $\pm$ 0 | 649 $\pm$ 0 |
| 1.8 mM L44 (>cmc)       | 420 $\pm$ 0                         | 516 $\pm$ 0      | 552 $\pm$ 0 | 591 $\pm$ 0 | 647 $\pm$ 0 |

Table S1. Absorption maxima ( $\pm$ SD,  $n \geq 3$ ) of THPP; TAPP; TSPP; and TCCP in presence and absence of Pluronic at the concentration above and below their estimated cmc.

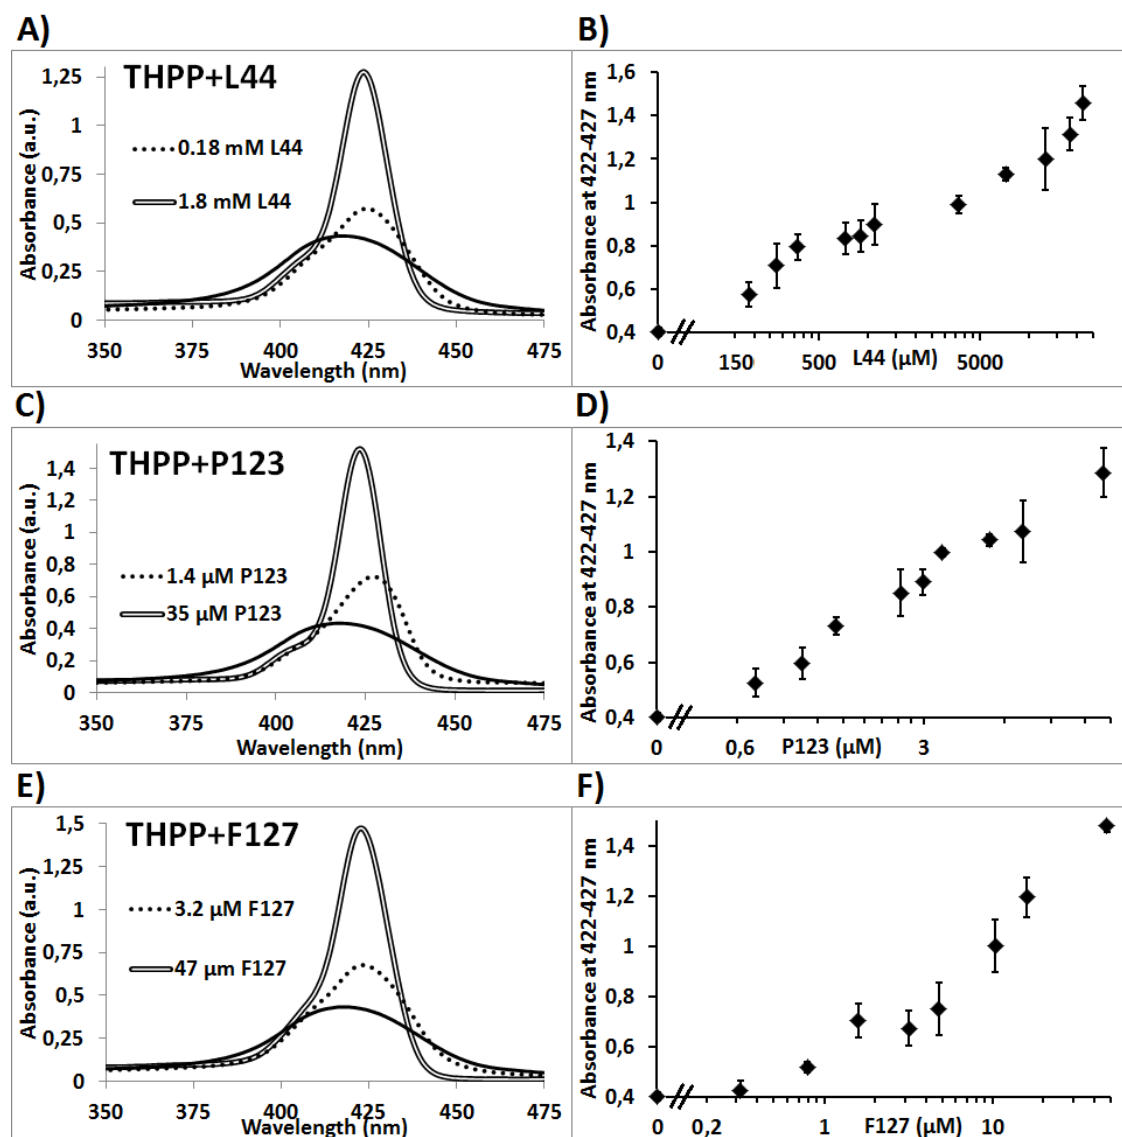

Suppl Fig. 1 UV-Visible absorption spectra (Soret band) of 5  $\mu$ M THPP in plain aqueous solution (—), and in presence of Pluronics L44 (A), P123 (C) and F127 (E) < cmc (•••) and > cmc (==). Absorbance at selected wavelengths as a function of Pluronic L44 (B), P123 (D) or F127 (F) content in 5  $\mu$ M THPP aqueous solutions. Each point is an average of  $\geq 3$  measurements. Bars represent SD of  $\geq 3$  measurements.

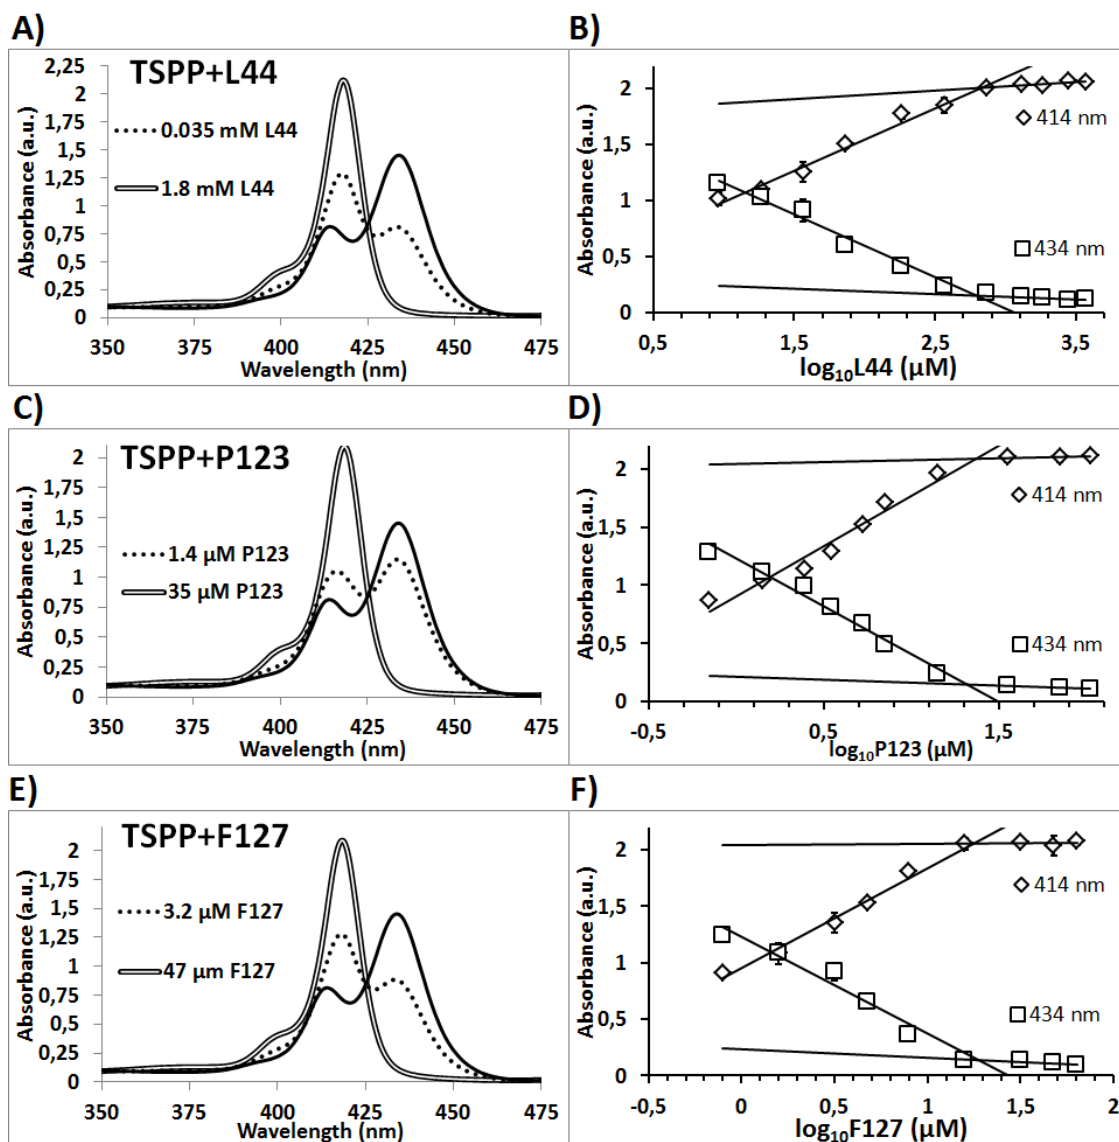

Suppl Fig. 2 UV-Visible absorption spectra (Soret band) of 5 μM TSPP in plain aqueous solution (—), and in presence of Pluronic L44 (A), P123 (C) and F127 (E) < cmc (•••) and > cmc (==). Absorbance at selected wavelengths as a function of log<sub>10</sub> L44 (B), P123 (D) or F127 (F) content in 5 μM TSPP aqueous solutions. Each point is an average of ≥ 3 measurements. Bars represent SD of ≥ 3 measurements.

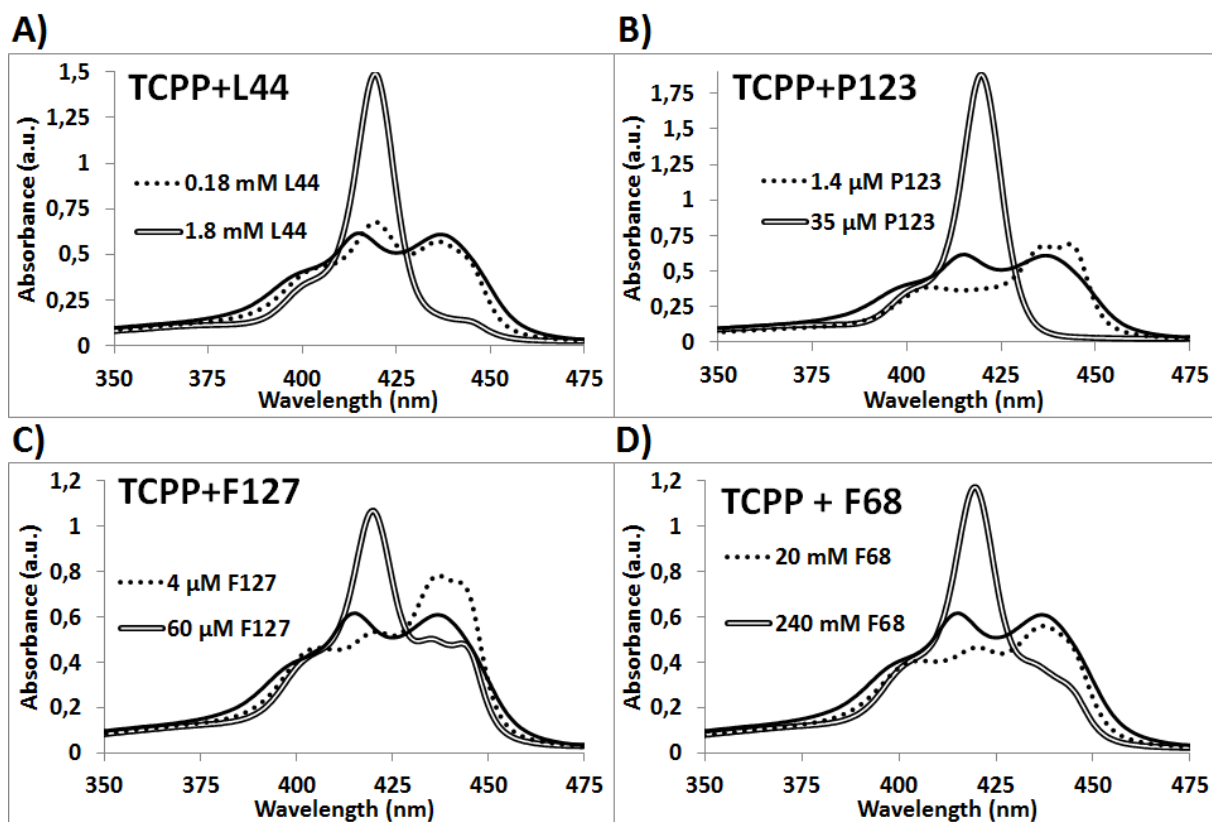

Suppl Fig. 3 UV-Visible absorption spectra (Soret band) of 5  $\mu$ M TCPP in plain aqueous solution (—), and in presence of Pluronic L44 (A), P123 (B), F127 (C) and F68 (D) < cmc (•••) and > cmc (==).

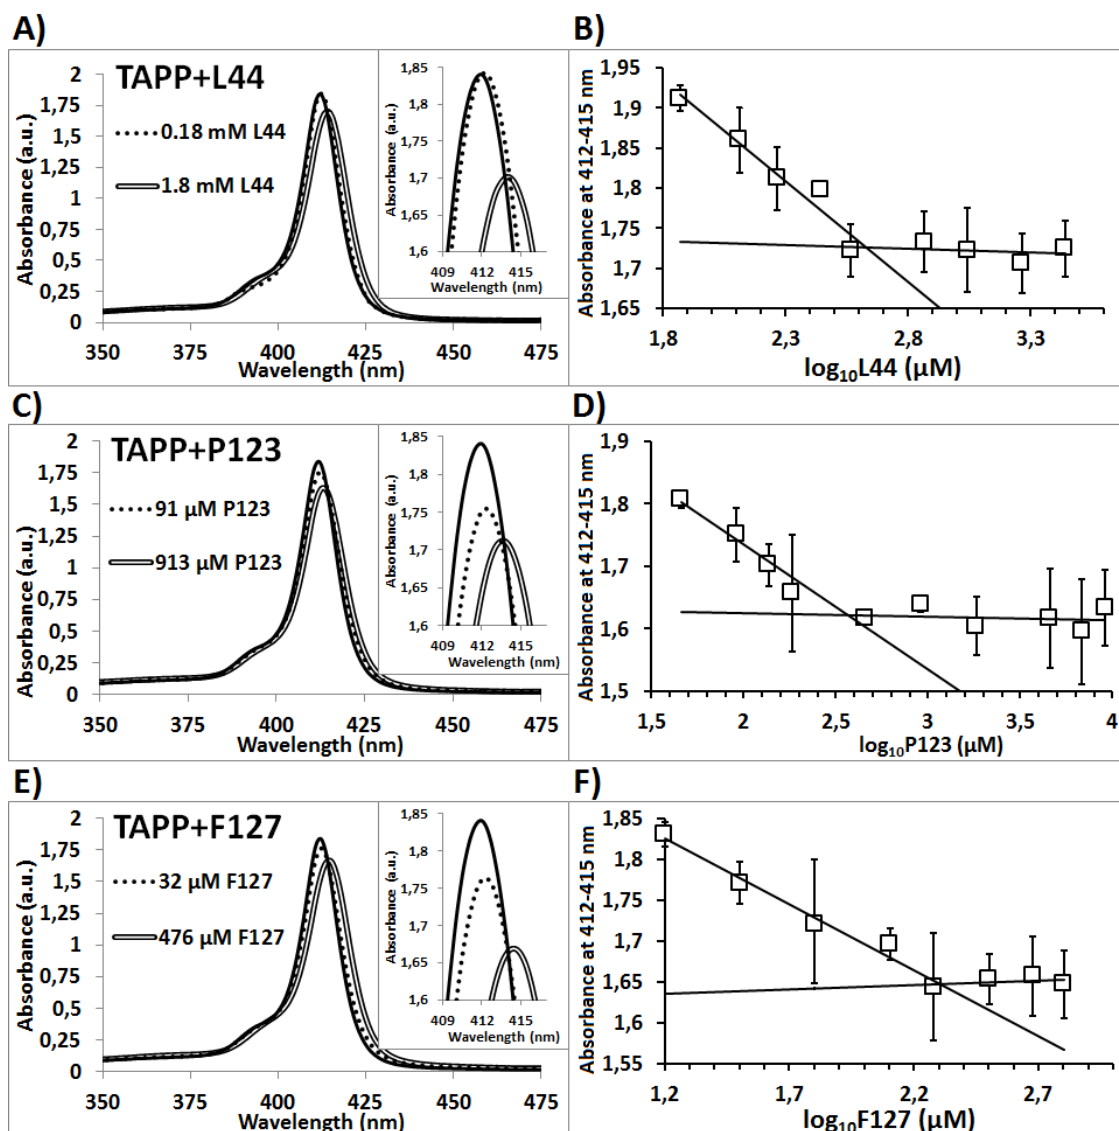

Suppl Fig. 4 UV-Visible absorption spectra (Soret band) of 5  $\mu\text{M}$  TAPP in plain aqueous solution (—), and in presence of L44 (A), P123 (C) and F127 (E)  $< \text{cmc}$  (•••) and  $> \text{cmc}$  (==). Absorbance at selected wavelengths as a function of log<sub>10</sub> L44 (B), P123 (D) or F127 (F) content in 5  $\mu\text{M}$  TAPP aqueous solutions. Each point is an average of  $\geq 3$  measurements. Bars represent SD of  $\geq 3$  measurements.

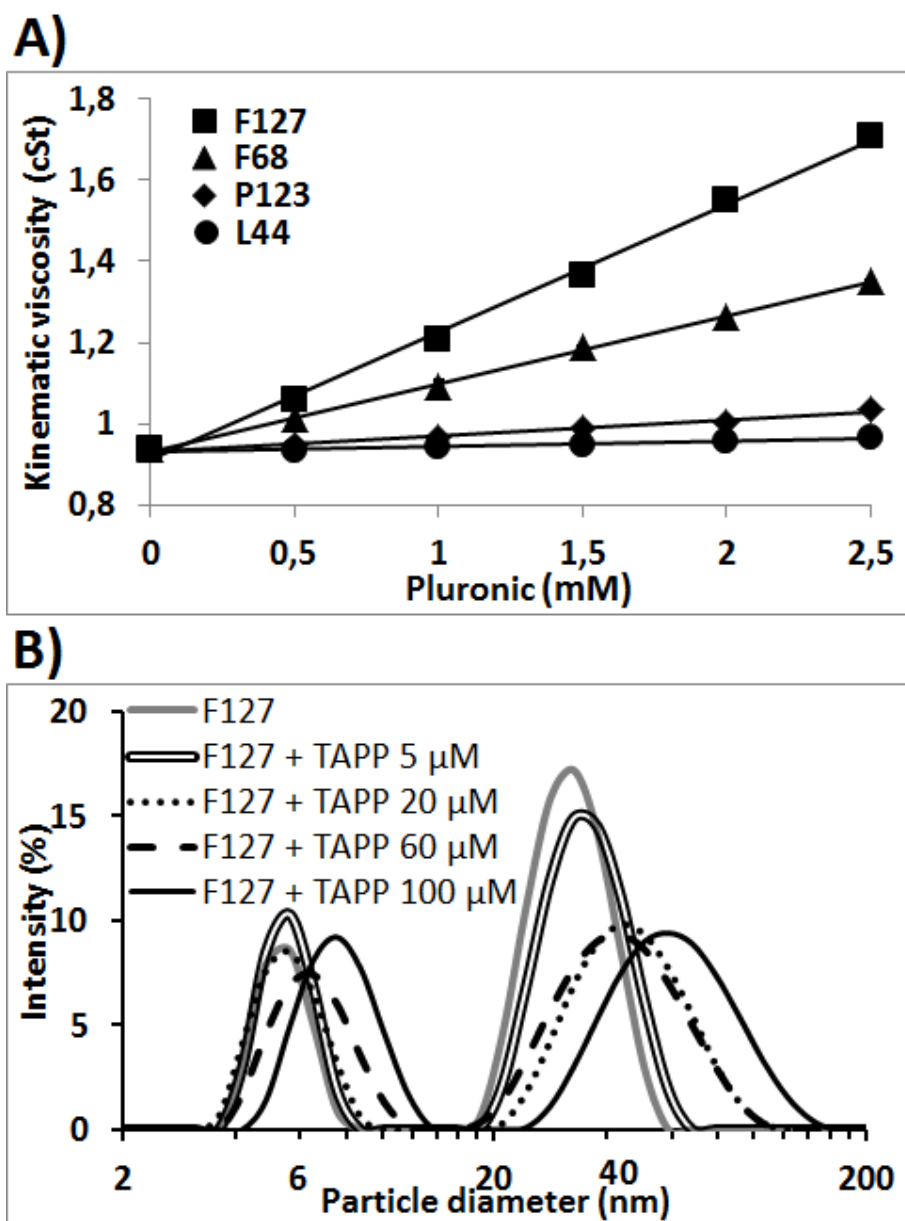

Suppl Fig. 5 A: Kinematic viscosity of Pluronic plain aqueous samples as a function of Pluronic concentration. Bars represent SD of 15 measurements. B: Size distribution by intensity of Pluronic F127 samples (2 mM) in presence of TAPP. One size distribution curve, representative for 5 replicate experiments, is presented for each concentration level.
